# Supplementary material
Source: publisher site journal article supplement (https://www.spandidos-publications.com/4940/downloadSupplementary)
Supplement: Supplementary file 1 [file downloadSupplementary]

## Sheet: sheet1
Table SI. Radiological techniques and parameters.
Radiological method	Paremeters	Case numbers		Parameter values		Cutoff	AUC	Sensitivity	Specificity	PPV	NPV	Accuracy	First author (Ref.)a	Published year
		CNSL (PCNSL)	Non-CNSL (HGG)	CNSL (PCNSL)	Non-CNSL (HGG)
DWI	ADC5%	11 (11)	23 (23)	0.56±0.08	0.77±0.15	0.68	0.885	1	0.739	NA	NA	NA	Nakajima et al (25)	2015
	ADCmean	43 (38)	44 (14)	0.86b	1.07b	NA	0.739b	91%b	61%b	70%b	87%b	76%b	Mabray et al (94)	2016
		15 (15)	84 (60)	0.66±0.13	0.93±0.21	0.76b	0.879	76%b	80%b	NA	NA	77%b	Cindil et al (32)	2021
		25 (25)	62 (62)	0.87±0.18	1.28±0.24	0.98	0.87	0.85	0.9	NA	NA	NA	Cindil et al (32)	2014
		12 (12)	24 (24)	1.1	1.4	1.3	0.826	0.69	0.89	NA	NA	NA	Lin et al (21)	2017
	rADCmean	18 (18)	42 (42)	1.12±0.23	1.49±0.27	1.32	0.858	0.762	0.833	NA	NA	NA	Lu et al (22)	2017
		31 (31)	57 (57)	1.12±0.21	1.49±0.37	1.29	0.825	0.737	0.871	NA	NA	NA	Ozturk et al (18)	2021
	ADCmin	33 (33)	54 (54)	0.73±0.13	0.89±0.19	0.82	0.75	0.73	0.722	NA	NA	NA	Makino et al (23)	2018
		30 (30)	70 (70)	6.01	7.29	5.66	0.63	0.7	0.367	0.720694	0.343955	0.6001	Saini et al (37)	2018
	ADCmax	37 (37)	37 (37)	1045.00±224.00	1445.00±312.00	1314	0.847	0.891892	0.702703	0.75	0.866667	0.797297	Eisenhut et al (93)	2020
PWI	rCBVmean	11 (11)	23 (23)	1.57±0.56	4.99±2.89	2.09	0.921	0.909	0.913	NA	NA	NA	Nakajima et al (25)	2015
		37 (37)	37 (37)	1.39±0.80	3.76±1.60	2.2	0.93	0.891892	0.837838	0.846154	0.885714	0.864865	Eisenhut et al (93)	2020
		11 (11)	15 (15)	1.38±0.64	5.19±2.21	2.68	1	1	1	1	1	1	Chaganti et al (33)	2021
	rCBVmax	33 (33)	54 (54)	2.12±1.05	8.42±3.73	3.93	0.98	0.97	0.907	NA	NA	NA	Makino et al (23)	2018
		16 (16)	40 (20)	1.32±0.58	7.65±4.75	2.18b	NA	100%b	98%b	NA	NA	99%b	Neska-Matuszewska et al (30)	2018
		40 (20)	40 (20)	3.89	5.67	4.25	0.68	0.757	0.533	0.79	0.48	0.69	Saini et al (37)	2018
	PSR	7 (7)	14 (14)	Higher	Lower	NA	0.83	NA	NA	NA	NA	NA	Lee et al (35)	2019
		15 (15)	84 (60)	164.05±37.00	95.30±20.12	112.00b	0.979b	100%b	93%b	NA	NA	95%b	Cindil et al (32)	2021
	PSR ratio	11 (11)	15 (15)	1.04±0.11	0.72±0.16	0.9	0.95	1	0.9091	NA	NA	NA	Chaganti et al (33)	2021
	Ktrans	18 (18)	42 (42)	0.28±0.12	0.15±0.10	0.19	0.852	0.833	0.833	NA	NA	NA	Lu et al (22)	2017
SWI	ITSS	30 (30)	70 (70)	2	3	3	0.8	0.743	0.767	0.881525	0.56122	0.7502	Saini et al (37)	2018
	rSWImean	31 (31)	57 (57)	1.20±0.28	0.99±0.16	0.94	0.723	1	0.404	NA	NA	NA	Ozturk et al (18)	2021
MRS	Lipid level	17 (17)	82 (82)	Higher	Lower	NA	NA	NA	NA	NA	NA	NA	Yamasaki et al (38)	2015
	mIns level	20 (20)	45 (45)	Lower	Higher	3.63	0.8	0.64	0.9	NA	NA	NA	Nagashima et al (39)	2018
18F PET CT	SUVmax	11 (11)	23 (23)	15.80±6.40	7.90±2.80	9.35	0.933	1	0.783	NA	NA	NA	Nakajima et al (25)	2015
		40 (40)	52 (52)	17.66±7.37	9.77±4.39	13.77	0.91	0.7692	0.9231	0.875	NA	0.8462	Zhou et al (42)	2018
All studies calculated cutoff, sensitivity, specificity, AUC, PPV, NPV and accuracy based on PCNSL and HGG numbers. aReferences are included in the manuscript; bValue of CNSL vs non-CNS. DWI, diffusion weighted imaging; ADC, apparent diffusion coefficient (x10-3mm2/sec); PCNSL, primary cranial nervous system lymphoma; HGG, high-grade gioma; GBM, glioblastoma; rCBV, relative cerebral blood volume;…
